# Supplementary material for: G4-SLSELEX-Seq-driven discovery of a G4-specific targeting L-RNA aptamer with unique structural features
Source: Royal Society of Chemistry journal article supplement (doi:10.1039/d5ob00526d), 2025-01-01
Supplement: d5ob00526d1.pdf [file d5ob00526d1.pdf]

## Supporting Information

### **G4-SLSELEX-Seq-driven discovery of G4-specific targeting L-RNA aptamer with unique structure features**

Tian-Ying Wu<sup>a</sup> and Chun Kit Kwok<sup>\* ab</sup>

<sup>a</sup>Department of Chemistry and State Key Laboratory of Marine Pollution, City University of Hong Kong, Kowloon Tong, Hong Kong SAR, China

<sup>b</sup>Shenzhen Research Institute of City University of Hong Kong, Shenzhen, China

<sup>\*</sup>To whom correspondence should be addressed. Tel: +852 3442 6858; Fax: +852 3442 0522; Email: ckkwok42@cityu.edu.hk

## Materials and Methods

**Table S1.** Sequences of the oligonucleotides used in this work.

**Table S2.** Condition of G4-SLSELEX-Seq for *in vitro* selection process.

**Table S3.** The enriched sequences in 2<sup>nd</sup> selection round obtained via next generation sequencing.

**Table S4.** The enriched sequences in 3<sup>rd</sup> selection round obtained via next generation sequencing.

**Table S5.** The enriched sequences in 4<sup>th</sup> selection round obtained via next generation sequencing.

**Table S6.** The enriched sequences in 5<sup>th</sup> selection round obtained via next generation sequencing.

**Figure S1** Binding of D-Apt.G5 to *c-kit* / L-dG4.

**Figure S2** Binding of D-Apt.G3 to *c-kit* / L-dG4 in binding buffer with different concentrations of MgCl<sub>2</sub>.

**Figure S3** Thermal difference spectrum (TDS) of D-Apt.G3.

**Figure S4** Ligand-enhanced fluorescence assay of D-Apt.G3 with ThT and NMM.

**Figure S5** Ligand-enhanced fluorescence assay of mutant D-Apt.G3 with ThT and NMM.

**Figure S6** Schematic of reverse transcription stalling (RTS) and SHALiPE probing.

**Figure S7** Binding and SHALiPE probing of D-Apt.G3\_ext with L-SL1.

**Figure S8** Binding of D-Apt.G3 to *c-kit* / D-dG4 and L-Apt.G3 to *c-kit* / L-dG4.

**Figure S9** Selectivity of L-Apt.G3 to hybrid dG4 and non-G4 structures.

**Figure S10** Competitive Binding of L-Apt.G3 and nucleolin to *c-kit* / D-dG4.

## Materials and Methods

### Preparation of Oligonucleotides

All oligonucleotides (oligos) utilized in this study were listed in **Table S1**. L-RNA oligos and L-DNA oligos were purchased from Biosyntech Co., Ltd. (Suzhou, China), D-RNA oligos were purchased from Integrated DNA Technologies Inc (USA) and Huzhou Hippo Biotechnology Co., Ltd. (Huzhou, China). D-DNA oligos were purchased from Genewiz Biotechnology Co., Ltd. (Suzhou, China). Oligos powder was dissolved in UltraPure<sup>TM</sup> distilled water (DNase- and RNase-free) (Invitrogen) and stored at -30 °C for further use.

### G4-SLSELEX-Seq

2  $\mu$ M Mix ssDNA N18 library was denatured with 3  $\mu$ M reverse primer for SELEX in 20 mM Tris-HCl buffer (pH 7.5) (Invitrogen) containing 4 mM MgCl<sub>2</sub> (Thermo Fisher Scientific, USA), 1 mM Dithiothreitol (DTT) (Invitrogen), 150 mM LiCl (Sigma, USA), and 1 mM dNTP Mix (Promega, USA) at 95 °C for 3 min, and reannealed at 35 °C for 10 min. Then the mixture was incubated with 10 U/ $\mu$ L Superscript III reverse transcriptase (Thermo Fisher Scientific, USA) at 50 °C for 50 min to obtain dsDNA library by primer extension and purified using Zymo-Spin IC DNA Columns (Zymo Research, USA). dsDNA library underwent transcription to produce RNAs with HiScribe T7 High Yield RNA Synthesis Kit (NEB, USA) at 37 °C for 3 h, followed with purification through 10% denaturing polyacrylamide gel electrophoresis (PAGE) and Zymo-Spin IC RNA Column (Zymo Research, USA). Before selection process, Streptavidin Magnetic Beads (750  $\mu$ g) (MCE, USA) were washed successively with 0.05 M NaCl solution (Invitrogen) containing 0.1 M NaOH (Sigma, USA), and 0.1 M NaCl solution, subsequently blocked with 7.5  $\mu$ g yeast tRNA (Invitrogen) through rotation at 25 °C, 700 rpm, for 30 min. Defined amount of RNA library pool was denatured in 25 mM Tris-HCl (pH 7.5) containing 1 or 5 mM MgCl<sub>2</sub> and 150 mM KCl (Fisher) (**Table S2**), then incubated with 250  $\mu$ g tRNA-blocked dynabeads for negative selection by shaking at 25 °C, 700 rpm, for 1 or 2 h. Bead-bound RNA sequences were separated and discarded, and supernatant was subjected to incubation with 5'-biotin-*c-kit* / L-dG4 target for positive selection by shaking at 37 °C, 300 rpm, for 30 min. The mixture was then incubated with remaining tRNA-blocked dynabeads by shaking at 25 °C, 700 rpm, for 30 min. Beads with G4-bound RNAs were separated and washed 5 times with 25 mM Tris-HCl (pH 7.5) containing 1 or 5 mM MgCl<sub>2</sub> and 150 mM KCl. G4-bound RNAs were eluted from beads twice with elution buffer (25 mM NaOH and 1 mM EDTA; Invitrogen) with both eluates pooled. The collected eluate was pH-

adjusted using 1 M Tris-HCl (pH 7.5) and subsequently purified via RNA column. Selected RNA sequences were converted to cDNA through reverse transcription by reacting with 0.33  $\mu$ M reverse primer and 10 U/ $\mu$ L Superscript III reverse transcriptase in 20 mM Tris-HCl (pH 7.5) containing 4 mM MgCl<sub>2</sub>, 1 mM DTT, 150 mM LiCl, and 1 mM dNTP mixture at 50 °C for 15 min. The reaction was halted with 2 M NaOH at 95 °C for 10 min, and then 1 M Tris-HCl (pH 7.5) was introduced for neutralization. The obtained cDNA was purified with RNA column. cDNA was prepared and amplified with 0.5  $\mu$ M forward and reverse primers and 2x Kapa Master Mix (Roche, Switzerland) in a 40  $\mu$ L reaction by PCR. Amplification cycle test was carried out with five aliquots at different cycles before large scale amplification. The amplified dsDNAs were purified with DNA column and transcribed to RNAs for next round of selection. 5 selection rounds were performed, and the conditions of each round were presented in **Table S2**. Following 5 rounds of selection, the amplified dsDNAs from 2<sup>nd</sup> to 5<sup>th</sup> rounds were further amplified with next generation sequencing (NGS) primers containing different barcodes by PCR respectively, and NGS analysis was conducted by Guangzhou IGE Biotechnology LTD (China).

### Electrophoretic Mobility Shift Assay (EMSA)

Aptamer was denatured and annealed in 25 mM Tris-HCl (pH 7.5) with 10 mM MgCl<sub>2</sub> and 150 mM KCl through heating at 95 °C for 5 min and cooling to room temperature (RT) for 20 min. 5'FAM-labeled binding target was mixed with aptamer and incubated at 37 °C for 1 h. After that, binding sample was mixed with 8% glycerol and loaded in 10% native PAGE (19:1, acrylamide: bis-acrylamide) for electrophoresis in 25 mM Tris-HCl (pH 7.5) containing 50 mM KOAc (J&K Scientific, China), and 10 mM MgCl<sub>2</sub> at 4 °C, 70 mA for 40 min. Gel image was acquired via Amersham™ Typhoon™ biomolecular imager (Cytiva, USA). The signal intensities of bound band ( $I_{bound}$ ) and unbound band ( $I_{unbound}$ ) in the gel images were measured via ImageJ software. The Fraction Bound was calculated using the equation: Fraction bound =  $I_{bound} / (I_{bound} + I_{unbound})$ . The binding curves of EMSA gel were fitted and  $K_d$  values and Hill coefficient (h) were obtained using GraphPad Prism with the model of “Specific binding with Hill slope”. The equation of this model is  $Y = B_{max} * X^h / (K_d^h + X^h)$ .

For competition binding assay, L-Apt.G3 in 25 mM Tris-HCl buffer (pH 7.5) containing 10 mM MgCl<sub>2</sub> and 150 mM KCl, and FAM-*c-kit* 1 D-dG4 were denatured and annealed separately through heating at 95 °C for 5 min and cooling to RT for 20 min. L-Apt.G3 in a concentration gradient and 200 nM DHX36 or nucleolin were added to dG4 target, and incubated at 37 °C for 1 h for competition binding. The binding sample was mixed with 8% glycerol and loaded in 6% non-denaturing PAGE (37.5:1, acrylamide: bis-

acrylamide) for electrophoresis in 25 mM Tris-HCl (pH 7.5) containing 50 mM KOAc, and 10 mM MgCl<sub>2</sub> at 4 °C, 35 mA for 70 min. Gel image was acquired by Amersham™ Typhoon™ biomolecular imager (Cytiva, USA). The signal intensities of bound band of protein-G4 complex ( $I_{pro-G4}$ ) and aptamer-G4 complex ( $I_{Apt-G4}$ ) in the gel images were measured via ImageQuantTL. The Fraction Bound to DHX36/Nucleolin was calculated using the equation: Fraction bound =  $I_{pro-G4} / (I_{pro-G4} + I_{Apt-G4})$ . The inhibition curves of EMSA gel were fitted and  $IC_{50}$  values were obtained using GraphPad Prism with the model of “[Inhibitor] vs. response -- Variable slope (four parameters)”. The equation of this model is  $Y = [Bottom + (Top - Bottom)] / [1 + (IC_{50} / X)^h]$ .

### Ligand-Enhanced Fluorescence Assay

Aptamer (500 nM) was annealed in 25 mM Tris-HCl (pH 7.5) containing 10 mM MgCl<sub>2</sub> and 150 mM KCl or LiCl through heating at 95 °C for 5 min, then cooling to RT for 20 min. 2 μM ThT (Solarbio Life Science, China) or NMM (Frontier Specialty Chemicals, USA) was added to the prepared aptamers, with subsequent incubation at RT for 30 min. The mixture was then loaded into a 1-cm path length quartz cuvette. Through exciting the samples at  $\lambda_{max}$  425 nm for ThT or 399 nm for NMM, the emission spectra of ligand-aptamer complex were acquired using HORIBA FluoroMax-4 fluorescence spectrophotometer (Japan).

### Circular Dichroism (CD) Spectroscopy

Apt.G3 (5 μM) was annealed in 25 mM Tris-HCl (pH 7.5) containing 10 mM MgCl<sub>2</sub> and 150 mM KCl or LiCl through heating at 95 °C for 5 min, then cooling to RT for 20 min. The aptamer solution was then loaded into a 1-cm path length quartz cuvette and the CD spectra were acquired by a Jasco CD J-150 spectrometer over a wavelength range of 220–320 nm with 1 nm intervals.

### UV Spectroscopy

D-Apt.G3 was prepared the same as CD experiments. For thermal difference spectra (TDS), UV spectra were acquired by a Cary 100 UV-Vis spectrophotometer in 20 °C and 95 °C at 295 nm. For UV melting assay, UV spectra were acquired at 295 nm, ranging from 20 °C to 95 °C in 0.5 °C steps.

### **Reverse Transcriptase Stalling Assay**

The 10  $\mu$ L mixture of Apt.G3\_ext (500 nM) and 5'-Cy5 reverse primer (500 nM) in 20 mM Tris-HCl (pH 7.5) containing 4 mM MgCl<sub>2</sub>, 1 mM DTT, 150 mM KCl/LiCl, and 1 mM dNTP Mix, was denatured at 75 °C for 3 min and reannealed at 35 °C for 10 min. For dideoxy sequencing, a 10  $\mu$ L mixture of Apt.G3\_ext (500 nM), 5'-Cy5 reverse primer (500 nM), and 1 mM dideoxynucleotide (ddNTPs) (Roche) was denatured and reannealed in the same 150 mM LiCl buffer and the same conditions used for RTS assay. Reverse transcription was initiated by introducing 100 U of Superscript III reverse transcriptase. The reaction was conducted at 50 °C for 15 min, then quenched with 0.5  $\mu$ L of 2 M NaOH through heating at 95 °C for 10 min. Finally, sample was mixed with 10  $\mu$ L of 2X formamide-denaturing loading dye for denaturing at 95 °C for 10 min and analyzed in 8% denaturing PAGE (19:1, acrylamide: bis-acrylamide) for electrophoresis in 1X TBE (Bio-Rad, USA) at RT, 90 W for 80 min. Gel image was collected by Amersham<sup>TM</sup> Typhoon<sup>TM</sup> biomolecular imager (Cytiva, USA).

### **Selective 2'Hydroxyl Acylation analyzed Lithium ion-mediated Primer Extension (SHALiPE)**

The 20  $\mu$ L mixture of Apt.G3\_ext (500 nM) and *c-kit* 1 L-dG4 or L-SL1 RNA (0, 1, 5, 10  $\mu$ M) in 25 mM Tris-HCl (pH 7.5) with 150 mM KCl and 10 mM MgCl<sub>2</sub> was denatured at 75 °C for 3 min, with subsequent reannealing at 35 °C for 10 min and incubation at 37 °C for 1 h. 1  $\mu$ L of 2 M NAI was added to mixture and incubated at 37 °C for 5 min to achieve RNA modification. The reaction was quenched with 5  $\mu$ L of 2 M DTT and purified via RNA column. The acylated RNA was assessed with the same reaction conditions and procedures as above RTS assay.

**Table S1.** Sequences of the oligonucleotides used in this work.

| Name                         | Sequence (5'-3')                                                                                 |
|------------------------------|--------------------------------------------------------------------------------------------------|
| ssDNA low GC N18 library     | TTCTAATACGACTCACTATAGGTTACCAGCCTTCACTGC<br>CGATGCT (N18) <sup>a</sup> AGCATCGGCACCACGGTCGGTCACAC |
| Forward primer for selection | TTCTAATACGACTCACTATAGGTTACCAGCCTTCACTGC                                                          |
| Reverse primer for selection | GTGTGACCGACCGTGGTGC                                                                              |
| Biotin- <i>c-kit</i> 1 L-dG4 | Biotin-AGGGAGGGCGCTGGGAGGAGGG (L-DNA bases)                                                      |
| FAM- <i>c-kit</i> 1 L-dG4    | FAM-AGGGAGGGCGCTGGGAGGAGGG (L-DNA bases)                                                         |
| FAM- <i>c-kit</i> 1 D-dG4    | FAM-AGGGAGGGCGCTGGGAGGAGGG                                                                       |
| Forward primer for NGS       | TCGTCGGCAGCGTCAGATGTGTATAAGAGACAGXXXXGG<br>TTACCAGCCTTCACTGC (XXXX: barcode)                     |
| Reverse primer for NGS       | GTCTCGTGGGCTCGGAGATGTGTATAAGAGACAGXXXXG<br>TGTGACCGACCGTGGTGC (XXXX: barcode)                    |
| D-Apt.12-6                   | CGCCGCCGGGUAUGAGGGAGGAGGGGGCGGCG                                                                 |
| D-Apt.G1                     | CGAUGCUGAGGAGAGGGCGGGCGGAAGCAUCG                                                                 |
| D- Apt.G2                    | CGAUGCUCGCGGGAGGGCGGGAGGAAGCAUCG                                                                 |
| D- Apt.G3                    | CGAUGCUGACGCGGGCGGGAGGGAGAGCAUCG                                                                 |
| D- Apt.G4                    | CGAUGCUGAGGGAGGAGAGGGCGGAAGCAUCG                                                                 |
| D- Apt.G5                    | CGAUGCUGGGCACGAGGGAGGAGGGAGCAUCG                                                                 |
| L-Apt.G3                     | CGAUGCUGACGCGGGCGGGAGGGAGAGCAUCG (L-RNA bases)                                                   |
| D-Apt.G3-M8                  | CGAUGCUAACGCGGGCGGGAGGGAGAGCAUCG <sup>b</sup>                                                    |
| D-Apt.G3-M11                 | CGAUGCUGACACGGGCGGGAGGGAGAGCAUCG                                                                 |
| D-Apt.G3-M13                 | CGAUGCUGACGCAAGGCGGGAGGGAGAGCAUCG                                                                |
| D-Apt.G3-M14                 | CGAUGCUGACGCGAGCGGGAGGGAGAGCAUCG                                                                 |
| D-Apt.G3-M15                 | CGAUGCUGACGCGGACGGGAGGGAGAGCAUCG                                                                 |
| D-Apt.G3-M17                 | CGAUGCUGACGCGGGCAGGAGGGAGAGCAUCG                                                                 |
| D-Apt.G3-M18                 | CGAUGCUGACGCGGGCGAGAGGGAGAGCAUCG                                                                 |
| D-Apt.G3-M19                 | CGAUGCUGACGCGGGCGGAGGGAGAGCAUCG                                                                  |
| D-Apt.G3-M21                 | CGAUGCUGACGCGGGCGGGAAGGAGAGCAUCG                                                                 |
| D-Apt.G3-M22                 | CGAUGCUGACGCGGGCGGGAGAGAGAGCAUCG                                                                 |
| D-Apt.G3-M23                 | CGAUGCUGACGCGGGCGGGAGGAGAGCAUCG                                                                  |
| D-Apt.G3-M25                 | CGAUGCUGACGCGGGCGGGAGGGAAGCAUCG                                                                  |
| Cy5-Reverse primer           | Cy5-GTGTGACCGACCGTGGTGC                                                                          |

for RTS and

SHALiPE assay

|                            |                                                                           |
|----------------------------|---------------------------------------------------------------------------|
| D-Apt.G3_ext               | GGUUACCAGCCUUCACUGCCGAUGCUGACGCGGGCGGGA<br>GGGAGAGCAUCGGCACACGGUCGGUCACAC |
| L-SL1 RNA                  | GGUUUAUACCUUCCCAGGUAACAAACC (L-RNA<br>bases)                              |
| FAM- <i>c-myc</i> D-dG4    | FAM-GGAGGGTGGGGAGGGTGGGGAA                                                |
| FAM- <i>c-kit</i> 2 D-dG4  | FAM-CGGGCGGGCGCGAGGGAGGGG                                                 |
| FAM- <i>Bcl-2mid</i> D-dG4 | FAM-GGGCGCGGGAGGAAGGGGGCGGG                                               |
| FAM-TBA D-dG4              | FAM-GGTTGGTGTGGTTGG                                                       |
| FAM-1I34 D-dG4             | FAM-GGTTTTGGCAGGGTTTTGGT                                                  |
| FAM-148D D-dG4             | FAM-GGTTGGTGTGGTTGGTT                                                     |
| FAM- <i>Hras-1</i> D-dG4   | FAM-TCGGGTTGCGGGCGCAGGGCACGGGCG                                           |
| FAM- <i>hTelo</i> D-dG4    | FAM-TTAGGGTTAGGGTTAGGGTTAGGG                                              |
| FAM-SYNDIG1 D-<br>dG4      | FAM-GGATGATGTTGGGCCGGTAGCGGG                                              |
| FAM-AKT1 D-dG4             | FAM-GGGCCGTGGGGCTCCCCGGGCGCTGGG                                           |
| FAM-2GKU D-dG4             | FAM-TTGGGTTAGGGTTAGGGTTAGGGA                                              |
| FAM- <i>hTERC</i> D-rG4    | FAM-GGGUUGCGGAGGGUGGGCCU                                                  |
| FAM- <i>KRAS</i> D-rG4     | FAM-GCGGCGGCGGAGGCA                                                       |
| FAM- <i>bcl-2</i> D-rG4    | FAM-GGGGGCCGUGGGGUGGGAGCUGGGG                                             |
| FAM- <i>APP</i> D-rG4      | FAM-GGGGCGGGUGGGGAGGGG                                                    |
| FAM-PolyA D-RNA            | FAM-AAAAAAAAAAAAAAAAAAAA                                                  |
| FAM-PolyC D-RNA            | FAM-CCCCCCCCCCCCCCCCCCC                                                   |
| FAM-PolyU D-RNA            | FAM-UUUUUUUUUUUUUUUUUU                                                    |
| FAM-Hairpin D-DNA          | FAM-CAGTACAGATCTGTACTG                                                    |
| FAM-Hairpin D-RNA          | FAM-CAGUACAGAUCUGUACUG                                                    |

---

a) The A:G:C:T ratio in ssDNA N18 library is 35%:15%:15%:35%. b) The mutated bases are in red font.



**Table S2.** Condition of G4-SLSELEX-Seq for *in vitro* selection process.

| <b>Rounds</b>                       | <b>1</b>       | <b>2</b>       | <b>3</b>       | <b>4</b> | <b>5</b> |
|-------------------------------------|----------------|----------------|----------------|----------|----------|
| MgCl <sub>2</sub> Conc. (mM)        | 5              | 5              | 5              | 5        | 1        |
| D-RNA pool (pmol)                   | 1000           | 100            | 75             | 50       | 50       |
| Biotin- <i>c-kit</i> 1 L-dG4 (pmol) | 200            | 20             | 20             | 10       | 3        |
| Negative selection (h)              | 2              | 2              | 2              | 1        | 1        |
| Positive selection (min)            | 30             | 30             | 30             | 30       | 30       |
| Washing (min)                       | Pipette<br>mix | Pipette<br>mix | Pipette<br>mix | 10       | 10       |
| Temperature (°C)                    | 37             | 37             | 37             | 37       | 37       |

**Table S3.** The enriched sequences in 2<sup>nd</sup> selection round obtained via next generation sequencing.

| No. | DNA sequence (5'-3')              | Number | Reads (%) |
|-----|-----------------------------------|--------|-----------|
| 1   | CGATGCTGAGGGGAGGGCGGAGCGGAGCATCG  | 42     | 0.0071    |
| 2   | CGATGCTCGGGAGGAGCGAGGAGGCAGCATCG  | 39     | 0.0066    |
| 3   | CGATGCTGGGAGGAGCGGGAGGGCGAGCATCG  | 38     | 0.0064    |
| 4   | CGATGCTCGGAGAGGGAGGGCGGGAAGCATCG  | 38     | 0.0064    |
| 5   | CGATGCTAGGGCGGAGCGGGAGGGCAGCATCG  | 37     | 0.0062    |
| 6   | CGATGCTGGGAGGCGAGGGAGGGCAAGCATCG  | 35     | 0.0059    |
| 7   | CGATGCTGGAGAGGAGAGGGCGGGGAGCATCG  | 34     | 0.0057    |
| 8   | CGATGCTGGAGAGGAGAGGGCGGGAAGCATCG  | 33     | 0.0056    |
| 9   | CGATGCTGCGGAGCGGGAGGGCGGAAGCATCG  | 33     | 0.0056    |
| 10  | CGATGCTAAGGGGGGGCGGAGCGGAGCATCG   | 32     | 0.0054    |
| 11  | CGATGCTAGGGCGGAGAGGGAGGGCAGCATCG  | 32     | 0.0054    |
| 12  | CGATGCTGGCGAGGGAGGGAGGGCAAGCATCG  | 32     | 0.0054    |
| 13  | CGATGCTGGAGAGGGAGGGCGGGCGAGCATCG  | 32     | 0.0054    |
| 14  | CGATGCTAGGGCGGAGAGGGCGGGCAGCATCG  | 30     | 0.0051    |
| 15  | CGATGCTCAGGAGGGGAAGGGAGGCAGCATCG  | 30     | 0.0051    |
| 16  | CGATGCTGAGGAGCGGGGGGGCGGAAGCATCG  | 30     | 0.0051    |
| 17  | CGATGCTCGGAGCGGGAGGGCGGGAAGCATCG  | 30     | 0.0051    |
| 18  | CGATGCTAGGGGAGAGGCGGAGAGGAGCATCG  | 30     | 0.0051    |
| 19  | CGATGCTGAGGGGCGGGAGGGCGAGGAGCATCG | 30     | 0.0051    |
| 20  | CGATGCTGAGGGGAGGGAGGAGCGGAGCATCG  | 29     | 0.0049    |
| 21  | CGATGCTCGAAGGGGGAGGAGGCAGAGCATCG  | 29     | 0.0049    |
| 22  | CGATGCTGAGGGGAGGGAGGAGAGGAGCATCG  | 29     | 0.0049    |
| 23  | CGATGCTAAGGGGCGGGAGGGCGAGGAGCATCG | 29     | 0.0049    |
| 24  | CGATGCTCGGGAGGAGCGGGCGGGAAGCATCG  | 29     | 0.0049    |
| 25  | CGATGCTGAGGGGCGGGAGGAGCGGAGCATCG  | 29     | 0.0049    |
| 26  | CGATGCTGAGGGGAGGGAGGGCGGAGCATCG   | 29     | 0.0049    |
| 27  | CGATGCTGGGAGGAGAGGGAGGGCGAGCATCG  | 29     | 0.0049    |
| 28  | CGATGCTAGGGGGGGCGGAGAGGGCAGCATCG  | 29     | 0.0049    |
| 29  | CGATGCTCGGCGAGGGAGGGAGGGAAGCATCG  | 29     | 0.0049    |
| 30  | CGATGCTGGAGAGGAGCGGGCGGGAAGCATCG  | 29     | 0.0049    |
| 31  | CGATGCTCAGGGCGGAGGGGCGGGAAGCATCG  | 28     | 0.0047    |
| 32  | CGATGCTGGCGAGGGAGGGGGGAAAGCATCG   | 28     | 0.0047    |
| 33  | CGATGCTGGAGAGGGGGAGGGCGGGAGCATCG  | 28     | 0.0047    |
| 34  | CGATGCTAGGGCGGGAGGAGCGGGCAGCATCG  | 28     | 0.0047    |
| 35  | CGATGCTGGAGAGGGAGGGCGGGCAAGCATCG  | 28     | 0.0047    |

|       |                                         |    |        |
|-------|-----------------------------------------|----|--------|
| 36    | CGATGCTGAGGGGCGGGGGGAGCGGAGCATCG        | 28 | 0.0047 |
| 37    | <b>CGATGCTGAGGAGAGGGCGGGCGGAAGCATCG</b> | 28 | 0.0047 |
| 38    | CGATGCTAAGGGGCGGGAGGAGCGGAGCATCG        | 28 | 0.0047 |
| 39    | CGATGCTGGGGGGAGAGGGAGGGCAAGCATCG        | 28 | 0.0047 |
| 40    | CGATGCTGAGGGGAGGGCGGAGAGGAGCATCG        | 27 | 0.0046 |
| 41    | CGATGCTGAGGGGAGGGAGGGCGAGGAGCATCG       | 27 | 0.0046 |
| 42    | CGATGCTAAGGGGAGGGAGGGCGAGGAGCATCG       | 27 | 0.0046 |
| 43    | CGATGCTGGGGAGGAAGAGGGCGGGAGCATCG        | 27 | 0.0046 |
| 44    | CGATGCTGGGCGGGAGGAGAGGGCAAGCATCG        | 27 | 0.0046 |
| 45    | CGATGCTCGGGAGGAGCGCGGAGGCAGCATCG        | 27 | 0.0046 |
| 46    | CGATGCTAAGGGGAGGGCGGAGCGGAGCATCG        | 27 | 0.0046 |
| 47    | CGATGCTAAGGGGAGGGCGGCGAGGAGCATCG        | 27 | 0.0046 |
| 48    | CGATGCTAGAGGGAGGAGAGGGCGGAGCATCG        | 27 | 0.0046 |
| 49    | CGATGCTGGAGCGGGAGGGGGGGCGAGCATCG        | 27 | 0.0046 |
| 50    | CGATGCTAGGGCGGCGAGGGAGGGCAGCATCG        | 27 | 0.0046 |
| 751   | <b>CGATGCTGACGCGGGCGGGAGGGAGAGCATCG</b> | 16 | 0.0027 |
| 1311  | <b>CGATGCTGAGGGAGGAGAGGGCGGAAGCATCG</b> | 13 | 0.0022 |
| 2085  | <b>CGATGCTGGGCACGAGGGAGGAGGGAGCATCG</b> | 12 | 0.0020 |
| 28248 | <b>CGATGCTCGCGGGAGGGCGGGAGGAAGCATCG</b> | 4  | 0.0007 |

a) The top 50 enriched sequences and selected aptamer candidates in 2<sup>nd</sup> selection round are shown. b) Bolded sequences represent selected aptamer candidates for investigation: No.37 (Apt.G1), No.28248 (Apt.G2), No.751 (Apt.G3), No.1311 (Apt.G4) and No.2085 (Apt.G5).

**Table S4.** The enriched sequences in 3<sup>rd</sup> selection round obtained via next generation sequencing.

| No. | DNA sequence (5'-3')                    | Number | Reads (%) |
|-----|-----------------------------------------|--------|-----------|
| 1   | CGATGCTCGGGAGGAGCGCGGAGGCAGCATCG        | 236    | 0.0296    |
| 2   | CGATGCTCGGGAGGAGCGAGGAGGCAGCATCG        | 192    | 0.0241    |
| 3   | CGATGCTGCGGAGCGGGAGGGCGGAAGCATCG        | 157    | 0.0197    |
| 4   | CGATGCTGCGGAGAGGGCGGGCGGAAGCATCG        | 135    | 0.0169    |
| 5   | CGATGCTGGGGCGGAGCGGAGGAGAAGCATCG        | 133    | 0.0167    |
| 6   | <b>CGATGCTGAGGAGAGGGCGGGCGGAAGCATCG</b> | 131    | 0.0164    |
| 7   | CGATGCTGAGGGGAGGGCGGAGCGGAGCATCG        | 128    | 0.0161    |
| 8   | CGATGCTGAGGGGAGGGAGGGCGCGGAGCATCG       | 127    | 0.0159    |
| 9   | CGATGCTGAGGGGAGGGCGGAGAGGAGCATCG        | 120    | 0.0151    |
| 10  | CGATGCTCACGGGGGAGGAGGCAGCAGCATCG        | 116    | 0.0146    |
| 11  | CGATGCTGAGGAGCGGGAGGGCGGAAGCATCG        | 112    | 0.0140    |
| 12  | CGATGCTCGGCGAGGGAGGGAGGGAAGCATCG        | 112    | 0.0140    |
| 13  | CGATGCTGAGGAGCGGGGGGGCGGAAGCATCG        | 110    | 0.0138    |
| 14  | CGATGCTCAGGAGGGGAAGGGAGGCAGCATCG        | 110    | 0.0138    |
| 15  | CGATGCTGAGGGGAGGGAGGGCGAGGAGCATCG       | 108    | 0.0135    |
| 16  | CGATGCTGGGAGGAGAGGGCGGGCAAGCATCG        | 107    | 0.0134    |
| 17  | <b>CGATGCTCGCGGGAGGGCGGGAGGAAGCATCG</b> | 104    | 0.0130    |
| 18  | CGATGCTGCGGAGCGGGGGGGCGGAAGCATCG        | 104    | 0.0130    |
| 19  | CGATGCTGGAGAGGGAGGGCGGGGAAGCATCG        | 103    | 0.0129    |
| 20  | CGATGCTGGAGAGGAGAGGGCGGGGAAGCATCG       | 102    | 0.0128    |
| 21  | CGATGCTGCGGAGCGGGCGGGCGGAAGCATCG        | 101    | 0.0127    |
| 22  | CGATGCTCGAAGGGGGAGGAGGCAGAGCATCG        | 100    | 0.0125    |
| 23  | CGATGCTGCGGAGAGGGAGGGCGGAAGCATCG        | 99     | 0.0124    |
| 24  | CGATGCTGGGAGGCGAGGGCGGGCAAGCATCG        | 97     | 0.0122    |
| 25  | CGATGCTGAGGGGAGGGCGGGCGAGGAGCATCG       | 97     | 0.0122    |
| 26  | CGATGCTGAGGGGCGGGAGGGCGAGGAGCATCG       | 94     | 0.0118    |
| 27  | CGATGCTGAGGAGCGGGCGGGCGGAAGCATCG        | 94     | 0.0118    |
| 28  | CGATGCTAAGGGGAGGGCGGAGCGGAGCATCG        | 93     | 0.0117    |
| 29  | CGATGCTGGAGAGGAGAGGGCGGGGAGCATCG        | 93     | 0.0117    |
| 30  | CGATGCTGGGAGGCGAGGGAGGGCAAGCATCG        | 92     | 0.0115    |
| 31  | CGATGCTGCGGAGAGGGCGGGAGGAAGCATCG        | 91     | 0.0114    |
| 32  | CGATGCTCGGAGCGGGAGGGCGGGAAGCATCG        | 91     | 0.0114    |
| 33  | CGATGCTGCGGAGGGGGAGGGCGGAAGCATCG        | 90     | 0.0113    |
| 34  | CGATGCTCGGCGAGGGGGGAGGGAAGCATCG         | 89     | 0.0112    |
| 35  | CGATGCTGGAGAGGGAGGGCGGGGGAGCATCG        | 88     | 0.0110    |

|     |                                         |    |        |
|-----|-----------------------------------------|----|--------|
| 36  | CGATGCTCAAAGGGGGAGGAGGCCGAGCATCG        | 88 | 0.0110 |
| 37  | CGATGCTCGGGAGGAGCGGGAGGGCAGCATCG        | 87 | 0.0109 |
| 38  | CGATGCTCGGAGAGGGAGGGCGGGAAGCATCG        | 86 | 0.0108 |
| 39  | CGATGCTCGGCGAGGGAGGGGGGGAAGCATCG        | 86 | 0.0108 |
| 40  | CGATGCTGAGGGGAGGGCGGCGGAGCATCG          | 85 | 0.0107 |
| 41  | CGATGCTAGGGAGGAGAGGGCGGGCAGCATCG        | 85 | 0.0107 |
| 42  | CGATGCTGGCGAGGGAGGGAGGGCAAGCATCG        | 85 | 0.0107 |
| 43  | CGATGCTGAGGGGCGGGAGGAGCGGAGCATCG        | 84 | 0.0105 |
| 44  | CGATGCTCGCGGGAGGGCGGGCGGAAGCATCG        | 84 | 0.0105 |
| 45  | CGATGCTAGGGCGGGAGGCGAGGGCAGCATCG        | 83 | 0.0104 |
| 46  | CGATGCTAGGCGAGGGGGGGCGGGAAGCATCG        | 83 | 0.0104 |
| 47  | CGATGCTAGGCGAGGGCGGGCGGGAAGCATCG        | 83 | 0.0104 |
| 48  | CGATGCTAAGGGGAGGGAGGCGCGGAGCATCG        | 82 | 0.0103 |
| 49  | CGATGCTCGGAGAGGGCGGGCGGGAAGCATCG        | 80 | 0.0100 |
| 50  | CGATGCTGGGAGGGAGGCGAGGGCAAGCATCG        | 80 | 0.0100 |
| 187 | <b>CGATGCTGAGGGAGGAGAGGGCGGAAGCATCG</b> | 59 | 0.0074 |
| 202 | <b>CGATGCTGGGCACGAGGGAGGAGGGAGCATCG</b> | 58 | 0.0073 |
| 380 | <b>CGATGCTGACGCGGGCGGGAGGGAGAGCATCG</b> | 49 | 0.0061 |

a) The top 50 enriched sequences and selected aptamer candidates in 3<sup>rd</sup> selection round are shown. b) Bolded sequences represent selected aptamer candidates for investigation: No.6 (Apt.G1), No.17 (Apt.G2), No.380 (Apt.G3), No.187 (Apt.G4) and No.202 (Apt.G5).

**Table S5.** The enriched sequences in 4<sup>th</sup> selection round obtained via next generation sequencing.

| No. | DNA sequence (5'-3')                    | Number | Reads (%) |
|-----|-----------------------------------------|--------|-----------|
| 1   | CGATGCTCGGGAGGAGCGCGGAGGCAGCATCG        | 837    | 0.0857    |
| 2   | CGATGCTGCGGAGCGGGAGGGCGGAAGCATCG        | 754    | 0.0772    |
| 3   | CGATGCTGCGGAGAGGGCGGGCGGAAGCATCG        | 666    | 0.0682    |
| 4   | <b>CGATGCTGAGGAGAGGGCGGGCGGAAGCATCG</b> | 614    | 0.0628    |
| 5   | CGATGCTGAGGAGCGGGAGGGCGGAAGCATCG        | 609    | 0.0623    |
| 6   | CGATGCTGGGGCGGAGCGGAGGAGAAGCATCG        | 593    | 0.0607    |
| 7   | CGATGCTCGGGAGGAGCGAGGAGGCAGCATCG        | 553    | 0.0566    |
| 8   | CGATGCTGAGGAGCGGGGGGGCGGAAGCATCG        | 496    | 0.0508    |
| 9   | CGATGCTGAGGAGCGGGCGGGCGGAAGCATCG        | 489    | 0.0500    |
| 10  | <b>CGATGCTCGCGGGAGGGCGGGAGGAAGCATCG</b> | 470    | 0.0481    |
| 11  | CGATGCTGCGGAGCGGGGGGGCGGAAGCATCG        | 470    | 0.0481    |
| 12  | CGATGCTGCGGAGCGGGCGGGCGGAAGCATCG        | 449    | 0.0460    |
| 13  | CGATGCTGAGGAGAGGGAGGGCGGAAGCATCG        | 421    | 0.0431    |
| 14  | CGATGCTCGCGGGAGGGCGGGCGGAAGCATCG        | 385    | 0.0394    |
| 15  | CGATGCTGAGGGGAGGGCGGAGCGGAGCATCG        | 380    | 0.0389    |
| 16  | CGATGCTGCGCGGGAGGGCGGGAGGAGCATCG        | 375    | 0.0384    |
| 17  | CGATGCTCACGGGGGAGGAGGCAGCAGCATCG        | 366    | 0.0375    |
| 18  | CGATGCTGCGGAGAGGGCGGGAGGAAGCATCG        | 358    | 0.0366    |
| 19  | CGATGCTCGGCGAGGGAGGGAGGGAAGCATCG        | 353    | 0.0361    |
| 20  | CGATGCTGCGGAGAGGGAGGGCGGAAGCATCG        | 343    | 0.0351    |
| 21  | CGATGCTACGCGGGAGGGCGGGAGGAGCATCG        | 340    | 0.0348    |
| 22  | CGATGCTCGGGCGGGAGGGCGGAGAAGCATCG        | 320    | 0.0328    |
| 23  | CGATGCTAGCGGGAGGCGAGGGCGGAGCATCG        | 311    | 0.0318    |
| 24  | CGATGCTCGGAGAGGGAGGGCGGGAAGCATCG        | 308    | 0.0315    |
| 25  | CGATGCTGAGGGGAGGGAGGCGCGGAGCATCG        | 305    | 0.0312    |
| 26  | CGATGCTGAGGGGAGGGCGGCGAGGAGCATCG        | 303    | 0.0310    |
| 27  | CGATGCTCGCGGGAGGGAGGGCGGAAGCATCG        | 302    | 0.0309    |
| 28  | CGATGCTCGGAGCGGGAGGGCGGGAAGCATCG        | 294    | 0.0301    |
| 29  | CGATGCTCGAGGGCGGGAGGGCGGAAGCATCG        | 289    | 0.0296    |
| 30  | CGATGCTCGGAGAGGGCGGGCGGGAAGCATCG        | 284    | 0.0291    |
| 31  | CGATGCTGAGGGGAGGGAGGCGAGGAGCATCG        | 278    | 0.0285    |
| 32  | CGATGCTGCGGAGCGGGCGGGAGGAAGCATCG        | 273    | 0.0279    |
| 33  | CGATGCTGCGGAGGGGGAGGGCGGAAGCATCG        | 269    | 0.0275    |
| 34  | CGATGCTGAGGAGAGGGCGGGAGGAAGCATCG        | 268    | 0.0274    |
| 35  | CGATGCTGGGGACGAGGGAGGAGGGAGCATCG        | 263    | 0.0269    |

|     |                                         |     |        |
|-----|-----------------------------------------|-----|--------|
| 36  | CGATGCTAGAGGGAGGCGAGGGCGGAGCATCG        | 262 | 0.0268 |
| 37  | CGATGCTCGCGGGAGGGGGGCGGAAGCATCG         | 259 | 0.0265 |
| 38  | CGATGCTGGAGAGGGAGGGCGGGGAAGCATCG        | 257 | 0.0263 |
| 39  | CGATGCTAGGGACGAGGGAGGCGGGAGCATCG        | 255 | 0.0261 |
| 40  | CGATGCTCGCGGGCGGGAGGGCGGAAGCATCG        | 254 | 0.0260 |
| 41  | CGATGCTCGCGGGAGGGCGGGAGGCAGCATCG        | 254 | 0.0260 |
| 42  | CGATGCTGAGGGGAGGGCGGGCGGAGCATCG         | 251 | 0.0257 |
| 43  | CGATGCTGCGAGGGAGGCGGGCGGAAGCATCG        | 250 | 0.0256 |
| 44  | CGATGCTGGAGAGGAGAGGGCGGGGAAGCATCG       | 245 | 0.0251 |
| 45  | CGATGCTGAGGGGCGGGAGGCGAGGAGCATCG        | 244 | 0.0250 |
| 46  | CGATGCTGAGGAGGGGGCGGGCGGAAGCATCG        | 242 | 0.0248 |
| 47  | CGATGCTCGAGGGAGGGAGGGCGGAAGCATCG        | 242 | 0.0248 |
| 48  | CGATGCTAGCGGGAGGCGCGGGAGGAGCATCG        | 240 | 0.0246 |
| 49  | CGATGCTGGGAGGCGAGGGCGGGCAAGCATCG        | 240 | 0.0246 |
| 50  | CGATGCTGAGGGGAGGGCGGAGAGGAGCATCG        | 239 | 0.0245 |
| 101 | <b>CGATGCTGAGGGAGGAGAGGGCGGAAGCATCG</b> | 198 | 0.0203 |
| 109 | <b>CGATGCTGGGCACGAGGGAGGAGGGAGCATCG</b> | 194 | 0.0199 |
| 184 | <b>CGATGCTGACGCGGGCGGGAGGGAGAGCATCG</b> | 167 | 0.0171 |

a) The top 50 enriched sequences and selected aptamer candidates in 4<sup>th</sup> selection round are shown. b) Bolded sequences represent selected aptamer candidates for investigation: No.4 (Apt.G1), No.10 (Apt.G2), No.184 (Apt.G3), No.101 (Apt.G4) and No.109 (Apt.G5).

**Table S6.** The enriched sequences in 5<sup>th</sup> selection round obtained via next generation sequencing.

| No. | DNA sequence (5'-3')                    | Number | Reads (%) |
|-----|-----------------------------------------|--------|-----------|
| 1   | <b>CGATGCTGAGGAGAGGGCGGGCGGAAGCATCG</b> | 1521   | 0.2044    |
| 2   | CGATGCTGC GGAGAGGGCGGGCGGAAGCATCG       | 1321   | 0.1775    |
| 3   | CGATGCTGAGGAGCGGGAGGGCGGAAGCATCG        | 1265   | 0.1700    |
| 4   | CGATGCTGC GGAGCGGGAGGGCGGAAGCATCG       | 1192   | 0.1602    |
| 5   | CGATGCTGAGGAGAGGGAGGGCGGAAGCATCG        | 1128   | 0.1516    |
| 6   | <b>CGATGCTCGCGGGAGGGCGGGAGGAAGCATCG</b> | 998    | 0.1341    |
| 7   | CGATGCTGC GGAGAGGGCGGGAGGAAGCATCG       | 947    | 0.1272    |
| 8   | CGATGCTGAGGAGCGGGGGGGCGGAAGCATCG        | 789    | 0.1060    |
| 9   | CGATGCTG GGGACGAGGGAGGAGGGAGCATCG       | 779    | 0.1047    |
| 10  | CGATGCTCGCGGGAGGGCGGGCGGAAGCATCG        | 765    | 0.1028    |
| 11  | CGATGCTCGAGGGCGGGAGGGCGGAAGCATCG        | 757    | 0.1017    |
| 12  | CGATGCTGAGGAGCGGGCGGGCGGAAGCATCG        | 737    | 0.0990    |
| 13  | CGATGCTGAGGAGAGGGCGGGAGGAAGCATCG        | 736    | 0.0989    |
| 14  | CGATGCTG GGGACGC GGGAGGAGGGAGCATCG      | 725    | 0.0974    |
| 15  | CGATGCTGC GGAGAGGGAGGGCGGAAGCATCG       | 689    | 0.0926    |
| 16  | CGATGCTAGGGACGAGGGAGGCGGGAGCATCG        | 656    | 0.0881    |
| 17  | CGATGCTCGCGGGAGGGAGGGCGGAAGCATCG        | 643    | 0.0864    |
| 18  | CGATGCTG GGGACGAGGGAGGCGGGAGCATCG       | 642    | 0.0863    |
| 19  | CGATGCTGC GGAGCGGGCGGGCGGAAGCATCG       | 625    | 0.0840    |
| 20  | CGATGCTAGAGGGAGGCGAGGGCGGAGCATCG        | 621    | 0.0834    |
| 21  | CGATGCTACGC GGGAGGGCGGGAGGAGCATCG       | 615    | 0.0826    |
| 22  | CGATGCTGCGAGGGAGGCGGGCGGAAGCATCG        | 611    | 0.0821    |
| 23  | CGATGCTGC GGAGCGGGGGGGCGGAAGCATCG       | 595    | 0.0799    |
| 24  | CGATGCTCGAGGGAGGGAGGGCGGAAGCATCG        | 585    | 0.0786    |
| 25  | CGATGCTGCGCGGGAGGGCGGGAGGAGCATCG        | 572    | 0.0769    |
| 26  | <b>CGATGCTGACGCGGGCGGGAGGGAGAGCATCG</b> | 559    | 0.0751    |
| 27  | CGATGCT GGGCACGC GGGAGGAGGGAGCATCG      | 551    | 0.0740    |
| 28  | CGATGCTCGCGGGAGGGCGGGAGGCAGCATCG        | 533    | 0.0716    |
| 29  | CGATGCTAGCGGGAGGCGAGGGCGGAGCATCG        | 524    | 0.0704    |
| 30  | <b>CGATGCTGAGGGAGGAGAGGGCGGAAGCATCG</b> | 506    | 0.0680    |
| 31  | CGATGCTAGGGACGC GGGAGGAGGGAGCATCG       | 474    | 0.0637    |
| 32  | CGATGCTCGAGGGAGGGAGGGAGGAAGCATCG        | 473    | 0.0636    |
| 33  | CGATGCTGAGGGAGGGCGGGCGGCAAGCATCG        | 467    | 0.0627    |
| 34  | CGATGCTACGAGGGAGGCGGGCGGAAGCATCG        | 464    | 0.0623    |
| 35  | <b>CGATGCTGGGCACGAGGGAGGAGGGAGCATCG</b> | 462    | 0.0621    |



|    |                                                              |     |        |
|----|--------------------------------------------------------------|-----|--------|
| 36 | CGATGCTGA <b>GG</b> AGC <b>GGG</b> <b>CGG</b> AGGAAGCATCG    | 448 | 0.0602 |
| 37 | CGATGCTGA <b>GGG</b> AGGCGA <b>GGG</b> CGGAAGCATCG           | 445 | 0.0598 |
| 38 | CGATGCTGC <b>GGG</b> AGGAG <b>GGG</b> CGGAAGCATCG            | 445 | 0.0598 |
| 39 | CGATGCTCGC <b>GGG</b> C <b>GGG</b> AG <b>GGG</b> CGGAAGCATCG | 444 | 0.0597 |
| 40 | CGATGCTAGA <b>GGG</b> AGGCGC <b>GGG</b> CGGAGCATCG           | 443 | 0.0595 |
| 41 | CGATGCTCGA <b>GGG</b> AG <b>GGG</b> CGGAGGAAGCATCG           | 443 | 0.0595 |
| 42 | CGATGCTCAC <b>GGGG</b> AGGAGG <b>CAG</b> CAGCATCG            | 437 | 0.0587 |
| 43 | CGATGCTGACGA <b>GGG</b> AG <b>GGG</b> CGGAGAGCATCG           | 434 | 0.0583 |
| 44 | CGATGCTC <b>GG</b> CGA <b>GGG</b> AG <b>GGG</b> AGGAAGCATCG  | 432 | 0.0580 |
| 45 | CGATGCTGCGA <b>GGG</b> AGG <b>CGG</b> AGGAAGCATCG            | 429 | 0.0576 |
| 46 | CGATGCTACGA <b>GGG</b> AGG <b>CGG</b> AGGAAGCATCG            | 429 | 0.0576 |
| 47 | CGATGCTAGC <b>GGG</b> AGGCGC <b>GGG</b> AGGAGCATCG           | 429 | 0.0576 |
| 48 | CGATGCTGC <b>GG</b> AGC <b>GGG</b> C <b>GGG</b> AGGAAGCATCG  | 428 | 0.0575 |
| 49 | CGATGCTCGA <b>GGG</b> AG <b>GGG</b> CGGAGGCAGCATCG           | 428 | 0.0575 |
| 50 | CGATGCTCGC <b>GGG</b> C <b>GGG</b> AG <b>GGG</b> AGGAAGCATCG | 428 | 0.0575 |

a) The top 50 enriched sequences and selected aptamer candidates in 5<sup>th</sup> selection round are shown. b) Bolded sequences represent selected aptamer candidates for investigation: No.1 (Apt.G1), No.6 (Apt.G2), No.26 (Apt.G3), No.30 (Apt.G4) and No.35 (Apt.G5). c) The G tracts within the loop are in red font.

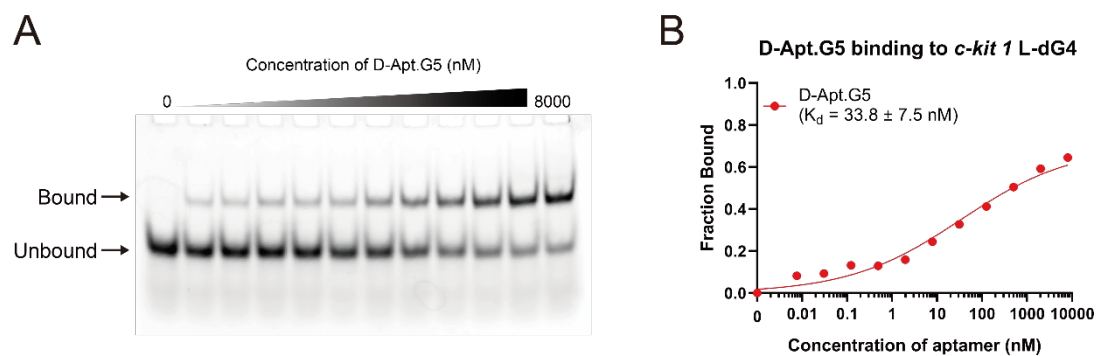

**Figure S1** Binding of D-Apt.G5 to *c-kit 1* L-dG4. A) The binding of D-Apt.G5 in a concentration gradient to FAM-*c-kit 1* L-dG4 (10 nM) was assessed using EMSA. The unbound dG4 target shifts upon interaction with D-Apt.G5, and the formation of the bound complex increases as the concentration of D-Apt.G5 rises, indicating the binding of D-Apt.G5 to G4 target. B) The binding curve of D-Apt.G5 to FAM-*c-kit 1* L-dG4 obtained from EMSA gel (A). The dissociation constant ( $K_d$ ) was found to be  $33.8 \pm 7.5$  nM with Hill coefficient (h) of 0.35, which is around 3-fold higher than that of D-Apt.G3 (**Fig. 2B and 2C**).

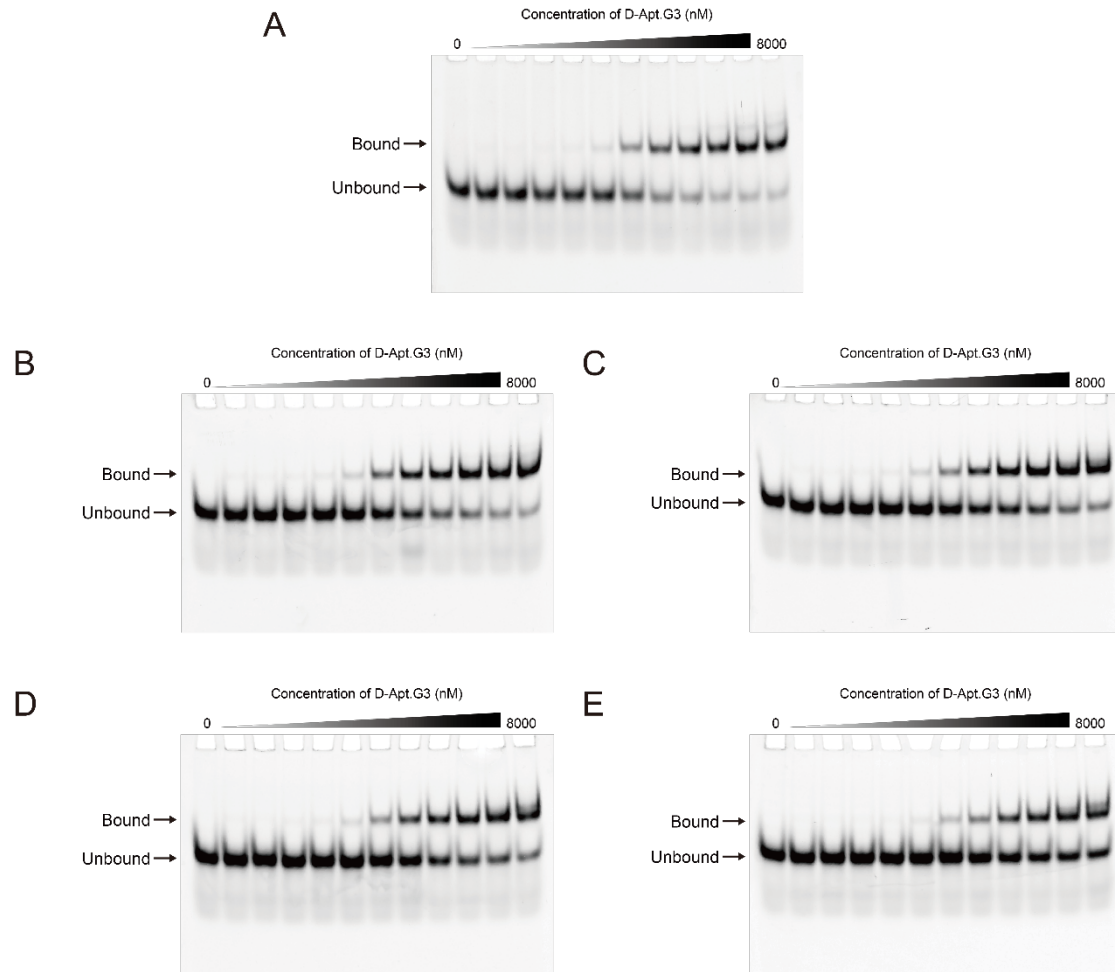

**Figure S2** Binding of D-Apt.G3 to *c-kit 1* L-dG4 in binding buffer with different concentrations of  $\text{MgCl}_2$ . The Binding of D-Apt.G3 in a concentration gradient to FAM-*c-kit 1* L-dG4 (10 nM) under buffer conditions with 10 mM  $\text{MgCl}_2$  (A), 5 mM  $\text{MgCl}_2$  (B), 2 mM  $\text{MgCl}_2$  (C), 1 mM  $\text{MgCl}_2$  (D) and without  $\text{Mg}^{2+}$  (E) was assessed using EMSA. The binding curves were obtained, and corresponding  $K_d$  values were calculated (**Fig. 2E**). With the decrease of  $\text{Mg}^{2+}$  concentration from 10 mM to 0 mM, the increased unbound target was observed on EMSA gel. Specifically, the  $K_d$  of D-Apt.G3 to *c-kit 1* L-dG4 increased from  $16.9 \pm 1.8$  nM to  $525.3 \pm 120.9$  nM, indicating that the binding of D-Apt.G3 to *c-kit 1* L-dG4 is magnesium-dependent, although D-Apt.G3 retains moderate binding capacity in the absence of  $\text{Mg}^{2+}$ .

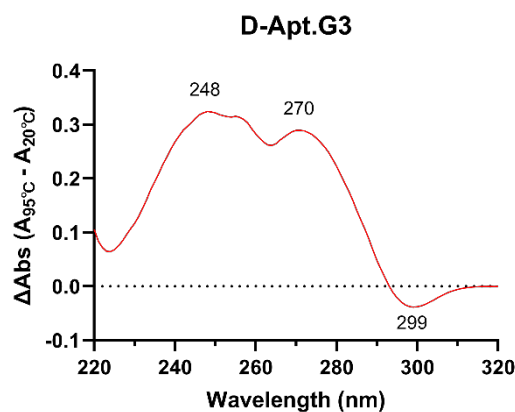

**Figure S3** Thermal difference spectrum (TDS) of D-Apt.G3. The UV spectra of D-Apt.G3 at 20 °C and 95 °C were measured at 295 nm. TDS profile of D-Apt.G3 was generated by subtracting the UV absorption at 20 °C from the absorption at 95 °C, which present the UV difference between the folded state and unfolded state of D-Apt.G3. The TDS profile shows positive peaks at 248 nm and 270 nm, along with a negative peak around 299 nm, which are characteristics of a G4 structure. The TDS factor value  $\Delta A_{240\text{nm}}/\Delta A_{295\text{nm}} > 4$  indicates that the G4 in D-Apt.G3 adopts a parallel topology.

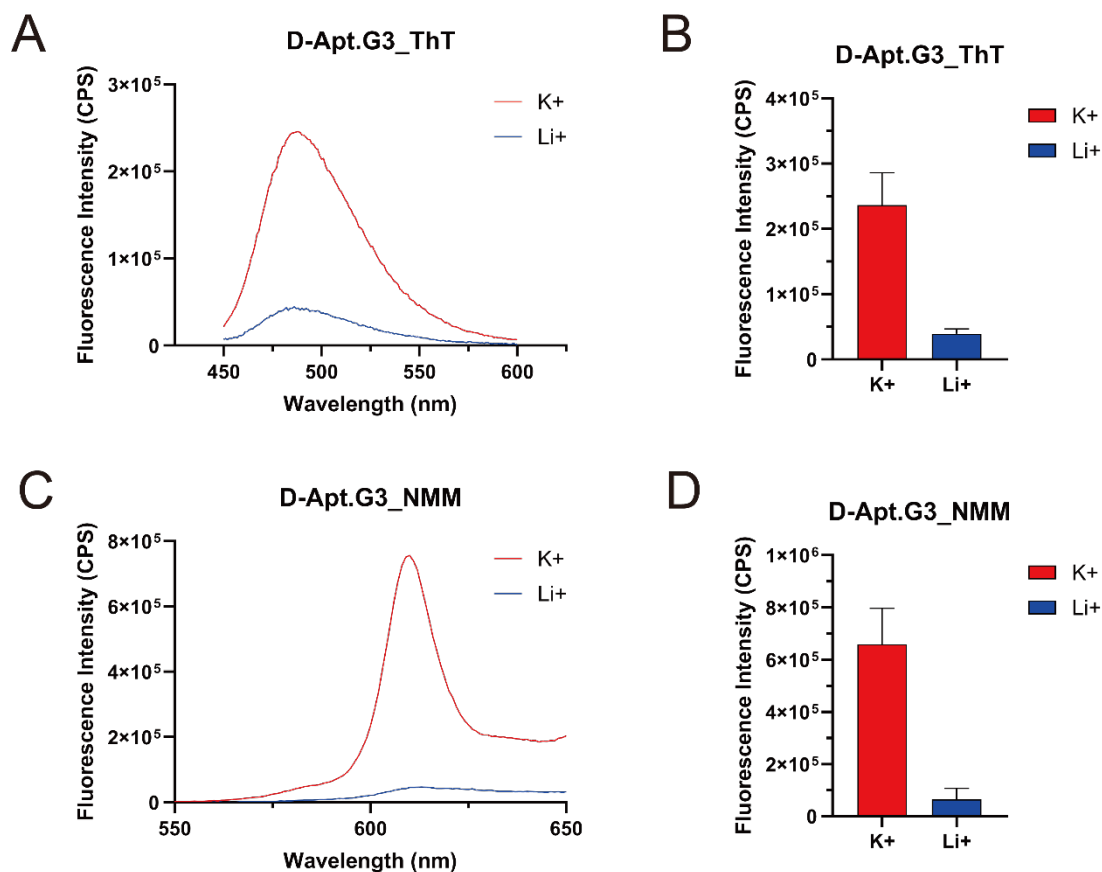

**Figure S4** Ligand-enhanced fluorescence assay of D-Apt.G3 with ThT and NMM. Fluorescence emission spectra of ThT (A) and NMM (C) were detected when incubating with D-Apt.G3 under K<sup>+</sup> and Li<sup>+</sup> conditions. The maximum fluorescence emission of ThT and NMM was obtained at 485 nm and 610 nm shown in (B) and (D) respectively. The fluorescence signal of both ThT and NMM enhance significantly when binding to D-Apt.G3 under K<sup>+</sup> conditions with an average 6.1-fold (ThT at  $\lambda_{485\text{nm}}$ ) and 12.2-fold increase ((NMM at  $\lambda_{610\text{nm}}$ ). These results confirmed the G4 formation in D-Apt.G3.

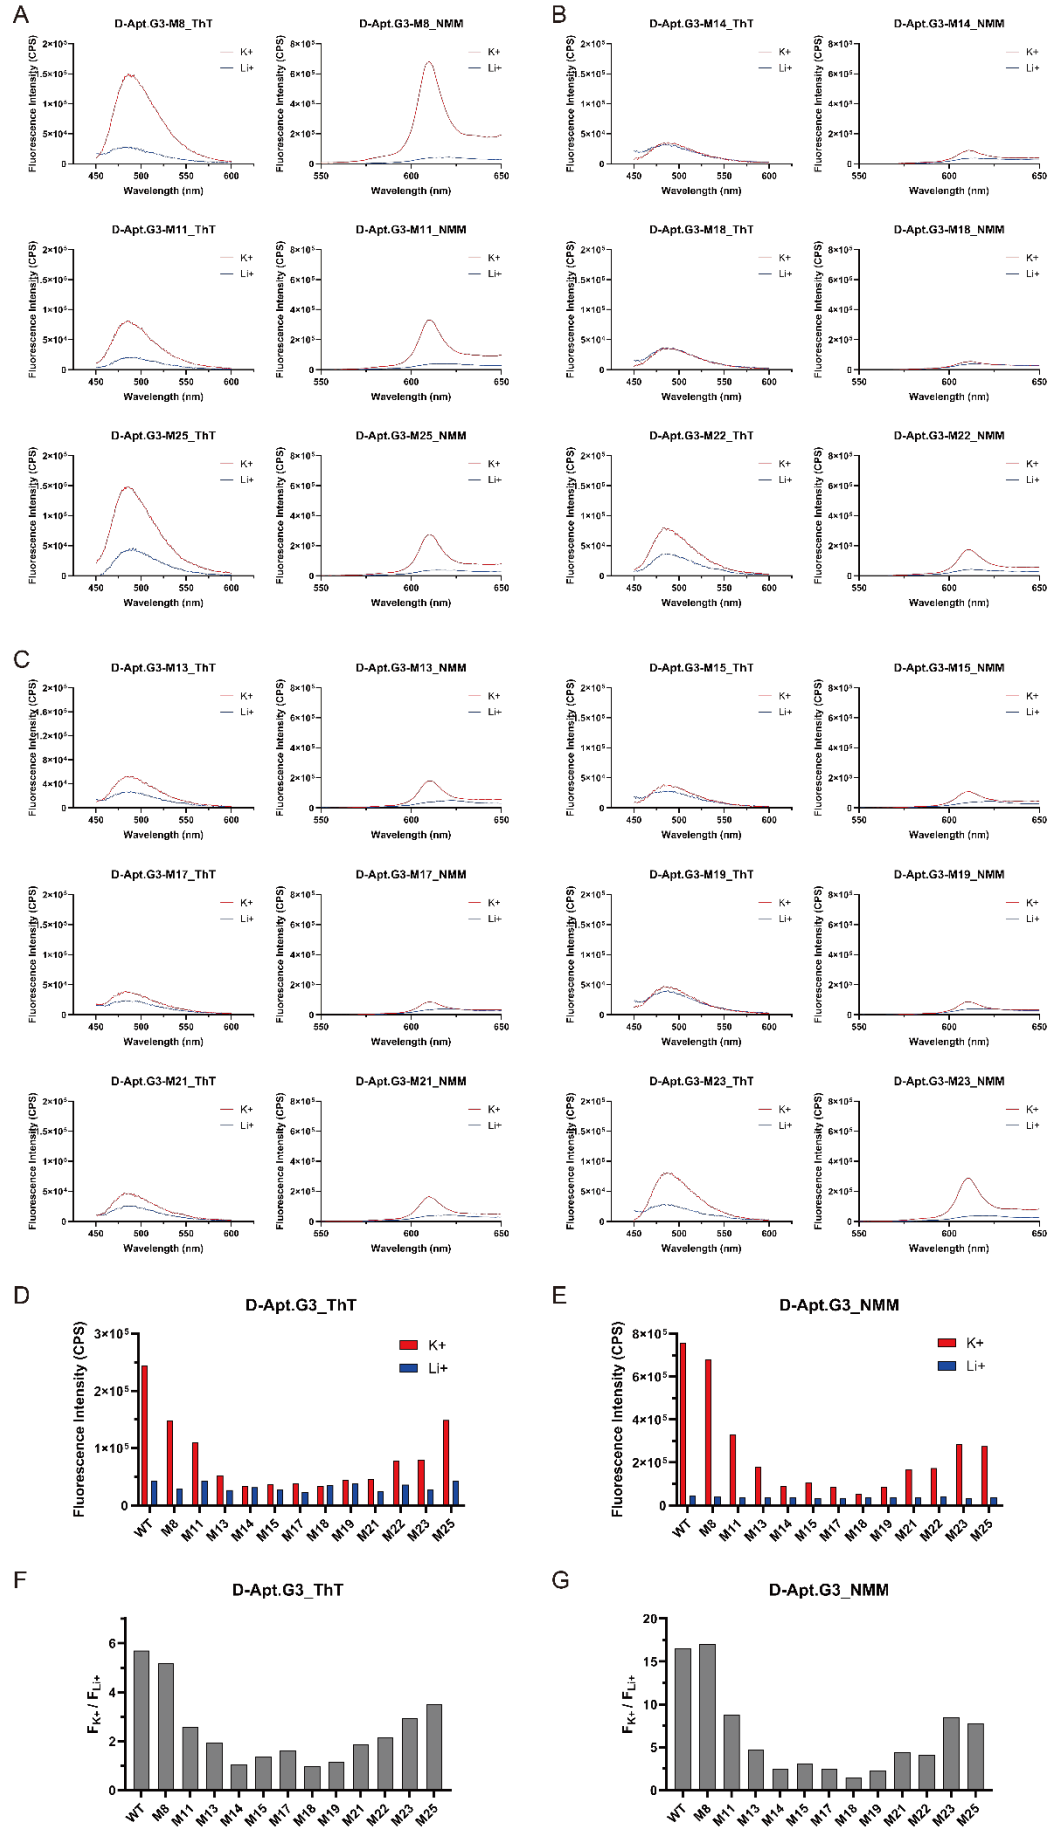

**Figure S5** Ligand-enhanced fluorescence assay of mutant D-Apt.G3 with ThT and NMM. The G4 formation of D-Apt.G3 with single mutation of G to A in loop region was assessed under conditions with  $K^+$  and  $Li^+$ . Mutations were performed on (A) non-consecutive G residues G8, G11, and G25, (B) the middle Gs in the three consecutive G tracts including G14, G18, and G22, (C) the other G residues in the consecutive G tracts including G13, G15, G17, G19, G22, and G23. The maximum fluorescence emission of ThT and NMM with different D-Apt.G3 mutants were obtained at 485 nm and 610 nm and shown in (D) and (E) respectively. The fold enhancement in fluorescence of ThT (F) and NMM (G) was determined by dividing the fluorescence intensity under  $K^+$  conditions by that under  $Li^+$  conditions. The fluorescence from both ThT and NMM decreased to varying degrees with the addition of different mutants of D-Apt.G3. Additionally, smaller differences in ligand fluorescence between  $K^+$  and  $Li^+$  conditions were observed. Among the tested mutations of D-Apt.G3, substitutions in Gs of the central G tract (G17, G18, and G19) and adjacent two G tracts including G13, G14, G15 and G21, have the greatest effect on G4 formation. Mutations in the remaining G residues in G tracts (G22 and G23) showed intermediate impacts, while non-consecutive Gs (G8, G11, and G25) displayed moderate to negligible effects. These findings suggested that G residues from three consecutive G tracts play critical roles in G4 formation.

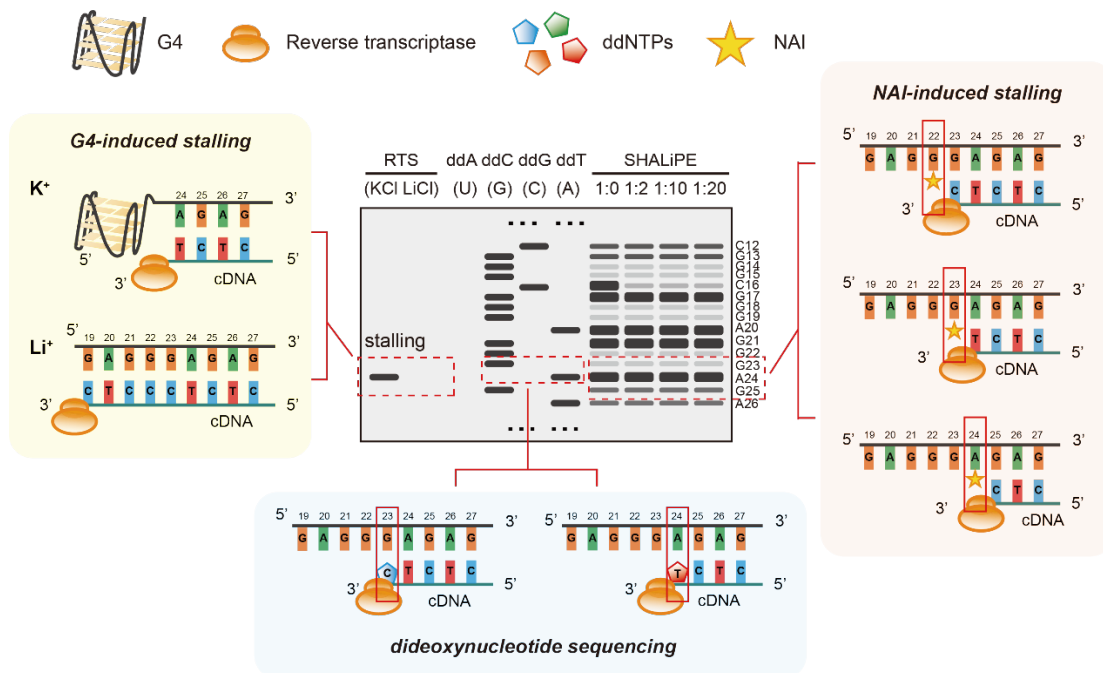

**Figure S6** Schematic of reverse transcription stalling (RTS) and SHALiPE probing. In RTS assay, G4 formation in the aptamer (in physiological relevant  $K^+$ -containing condition) stalls reverse transcription elongation, producing a stalling band before the G-tracts. On the contrary, G4 is not stabilized in  $Li^+$ -containing condition, therefore no stalling band. In dideoxynucleoside (ddNTP) sequencing, each ddNTP incorporation terminates elongation due to the absence of 3'-OH group, generating stalled bands at the position of the incorporated ddNTP. In SHALiPE assay, 2-methylnicotinic acid imidazolid (NAI) modifies the 2'-OH group of flexible nucleotides in single-stranded RNA, stalling reverse transcription and presenting stalled bands located one nucleotide before the modified site.



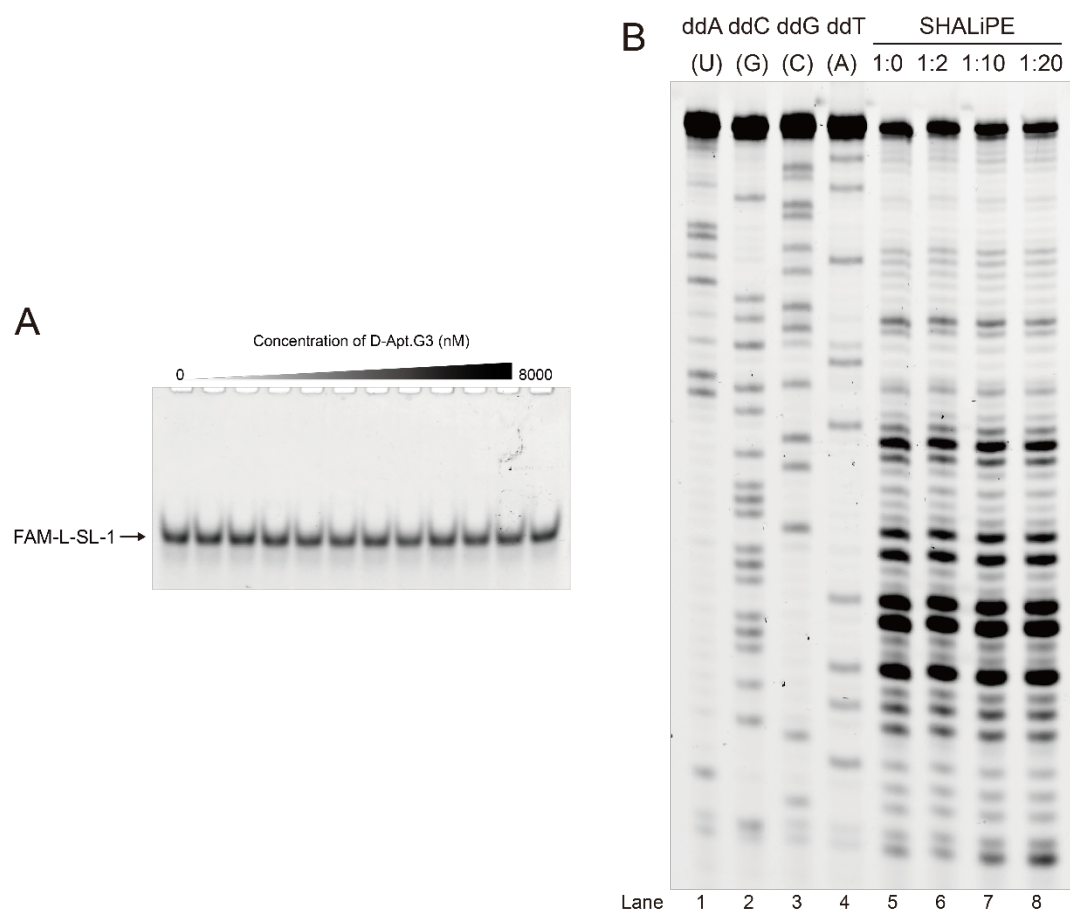

**Figure S7** Binding and SHALiPE probing of D-Apt.G3\_ext with L-SL1. (A) The binding of D-Apt.G3 in a concentration gradient to FAM-L-SL1 (10 nM) was assessed using EMSA. The result shows no binding between D-Apt.G3\_ext with L-SL1, indicating that L-SL1 can work as a negative control for comparison to G4 target in SHALiPE. (B) SHALiPE probing of D-Apt.G3\_ext with L-SL1 was assessed. Lanes 1-4: Dideoxy sequencing ladder of D-Apt.G3\_ext. Lanes 5-8: SHALiPE probing of D-Apt.G3\_ext with increased L-SL1 (1:0, 1:2, 1:10, and 1:20). L-SL1 addition did not affect the NAI reaction with D-Apt.G3\_ext, as shown from lane 5 to lane 8.

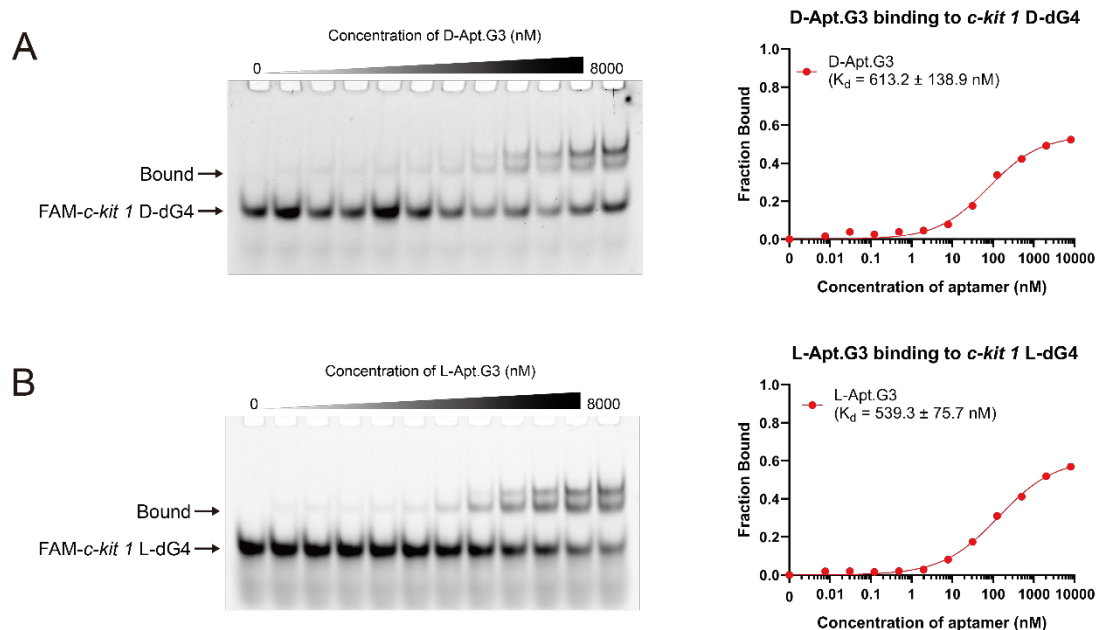

**Figure S8** Binding of D-Apt.G3 to *c-kit 1* D-dG4 and L-Apt.G3 to *c-kit 1* L-dG4. A) The binding of D-Apt.G3 in a concentration gradient to FAM-*c-kit 1* D-dG4 (10 nM) was assessed using EMSA and the binding curve was generated from the gel. At high concentrations of D-Apt.G3, multiple bound bands were observed compared to its binding to *c-kit 1* L-dG4 (**Fig. 2B and 2C**). This likely reflects non-specific interactions between D-Apt.G3 and *c-kit 1* D-dG4, resulting in approximately a 51-fold increase in  $K_d$  ( $613.2 \pm 138.9$  nM,  $h = 0.38$ ). B) The binding of L-Apt.G3 in a concentration gradient to FAM-*c-kit 1* L-dG4 (10 nM) was assessed using EMSA and the binding curve was generated from the gel. Similar to the binding of D-form aptamers to D-form targets, more than one bound band were observed at high concentrations of L-Apt.G3, compared to its binding to *c-kit 1* D-dG4 (**Fig. 4A and 4B**). This suggests non-specific binding of L-Apt.G3 to *c-kit 1* L-dG4 with a  $K_d$  of  $539.3 \pm 75.7$  nM,  $h = 0.44$ , which is approximately 61 times greater than the binding of L-form aptamers to D-form target.

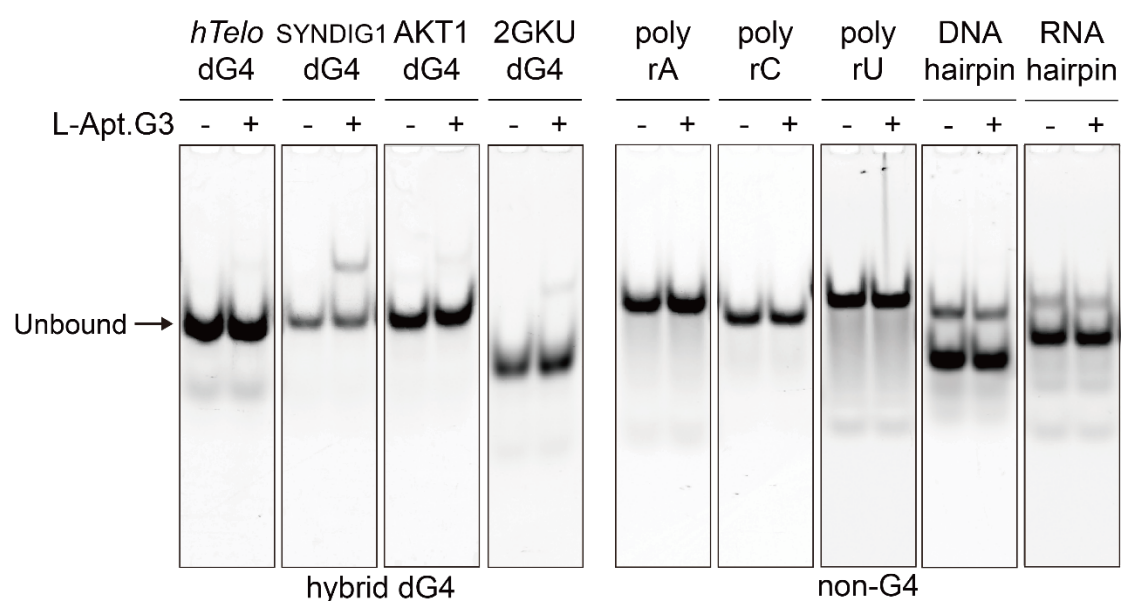

**Figure S9** Selectivity of L-Apt.G3 to hybrid dG4s and non-G4 structures. The binding of L-Apt.G3 (50 nM) to 5'FAM-labeled hybrid dG4s including *hTelo* D-dG4, SYNDIG1 D-dG4, AKT1 D-dG4 and 2GKU D-dG4, 5'FAM-labeled non-G4 structures including poly A/C/U D-RNA, D-DNA and D-RNA hairpin were assessed using EMSA. L-Apt.G3 hardly bound to these hybrid dG4s and exhibited no binding to all tested non-G4 structures, suggesting that L-Apt.G3 possesses conformation specificity to parallel and antiparallel G4s rather than hybrid dG4s and non-G4 structures.

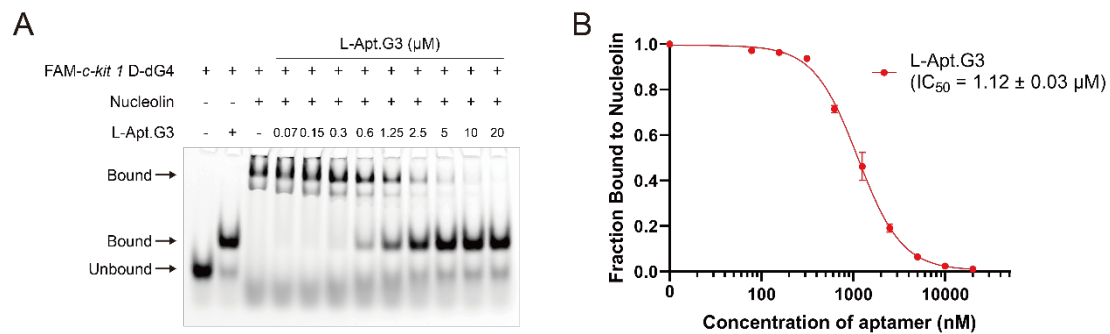

**Figure S10** Competitive Binding of L-Apt.G3 and nucleolin to *c-kit* 1 D-dG4. A) L-Apt.G3 in a concentration gradient competed with nucleolin (200 nM) to bind FAM-*c-kit* 1 D-dG4 (10 nM) assessed by EMSA. Nucleolin strongly bound to *c-kit* 1 D-dG4 without aptamer. With the increase of L-Apt.G3, the nucleolin-G4 complex reduced and aptamer-G4 complex increased. B) Inhibition curve of L-Apt.G3 to FAM-*c-kit* 1 D-dG4-nucleolin interaction generated from (A).  $IC_{50}$  was found to be  $1.12 \pm 0.03 \mu\text{M}$  (Error bars: standard deviation,  $n = 3$ ).
